# Supplementary material
Source: PubMed Central journal article supplement (PMC2850623)
Supplement: ddq060_1.pdf [file ddq060_1.pdf]

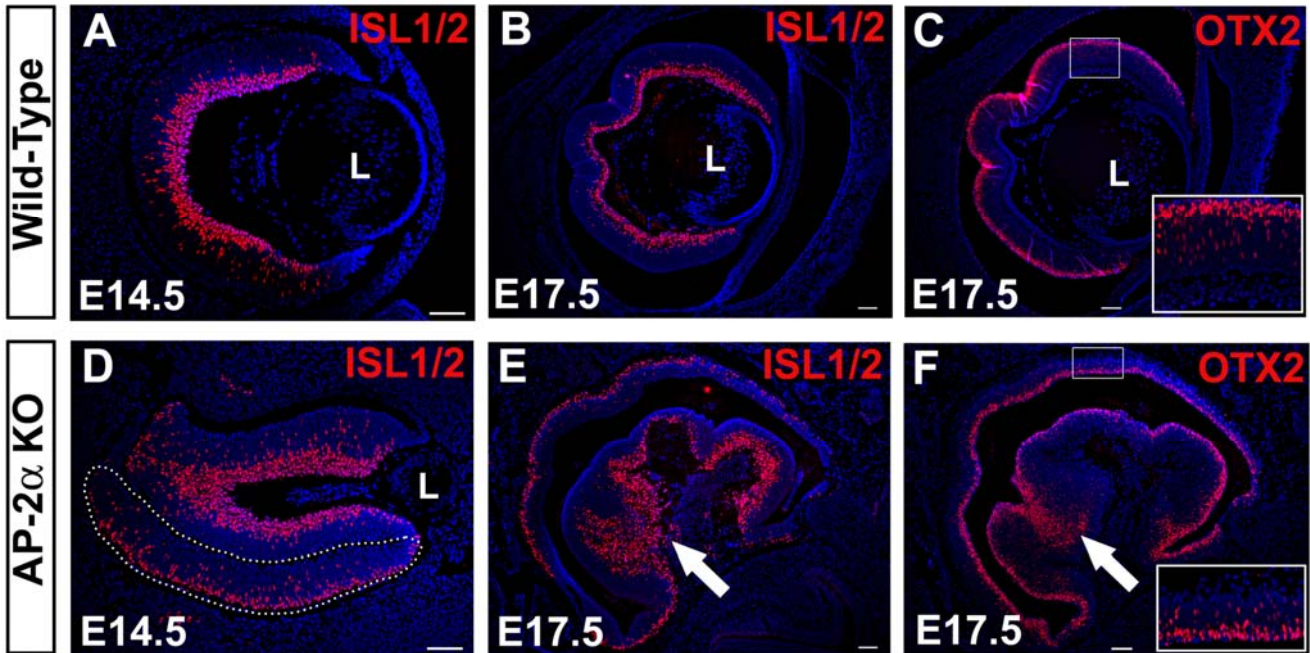

**Supplementary Figure S1. NR lamination defects and continued loss of RPE characteristics in the AP-2 $\alpha$  KO OC at later stages.** (A-F) Immunofluorescence using anti-ISL1/2 (red) and anti-OTX2 (red) on coronal sections of wild-type (A-C) and AP-2 $\alpha$  KO (D-F) embryo heads counterstained with DAPI (blue), at the stages indicated. Outlined area (D) shows inverted pattern of ISL1/2 expression in duplicated AP-2 $\alpha$  KO NR. Arrows (E,F) indicate regions of disorganization of NR architecture in AP-2 $\alpha$  KO by E17.5. Boxed regions (C,F) are magnified in insets. L, lens. Scalebars, 100  $\mu$ m.
